# Supplementary material for: Norepinephrine promotes tumor microenvironment reactivity through β3-adrenoreceptors during melanoma progression
Source: Oncotarget. 2014 Dec 6;6(7):4615–32. doi: 10.18632/oncotarget.2652 (PMC4467103; doi:10.18632/oncotarget.2652)
Supplement: Supplementary file 1 [file oncotarget-06-4615-s001.pdf]

## SUPPLEMENTARY FIGURES

**A**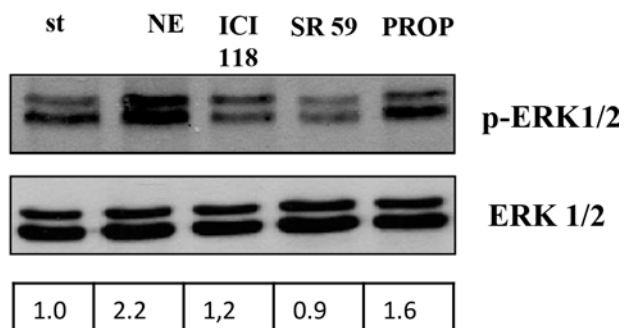**B**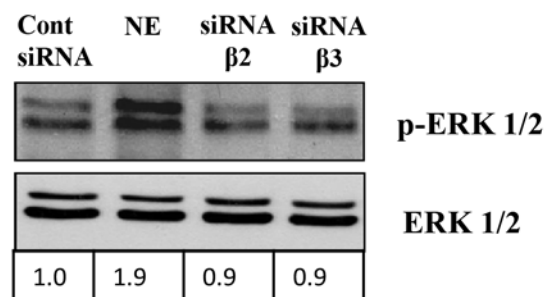

**Supplementary Figure S1:** A375 cells were serum starved for 24 hrs and then incubated in the presence or absence of NE (10  $\mu$ M) with or without  $\beta$ -ARs antagonists ICI 118 (10  $\mu$ M), SR59230A and propranolol (1  $\mu$ M) for additional 24 hrs. Western blotting for phosphorylation of ERK and total ERK was performed. Total ERK were performed as control.

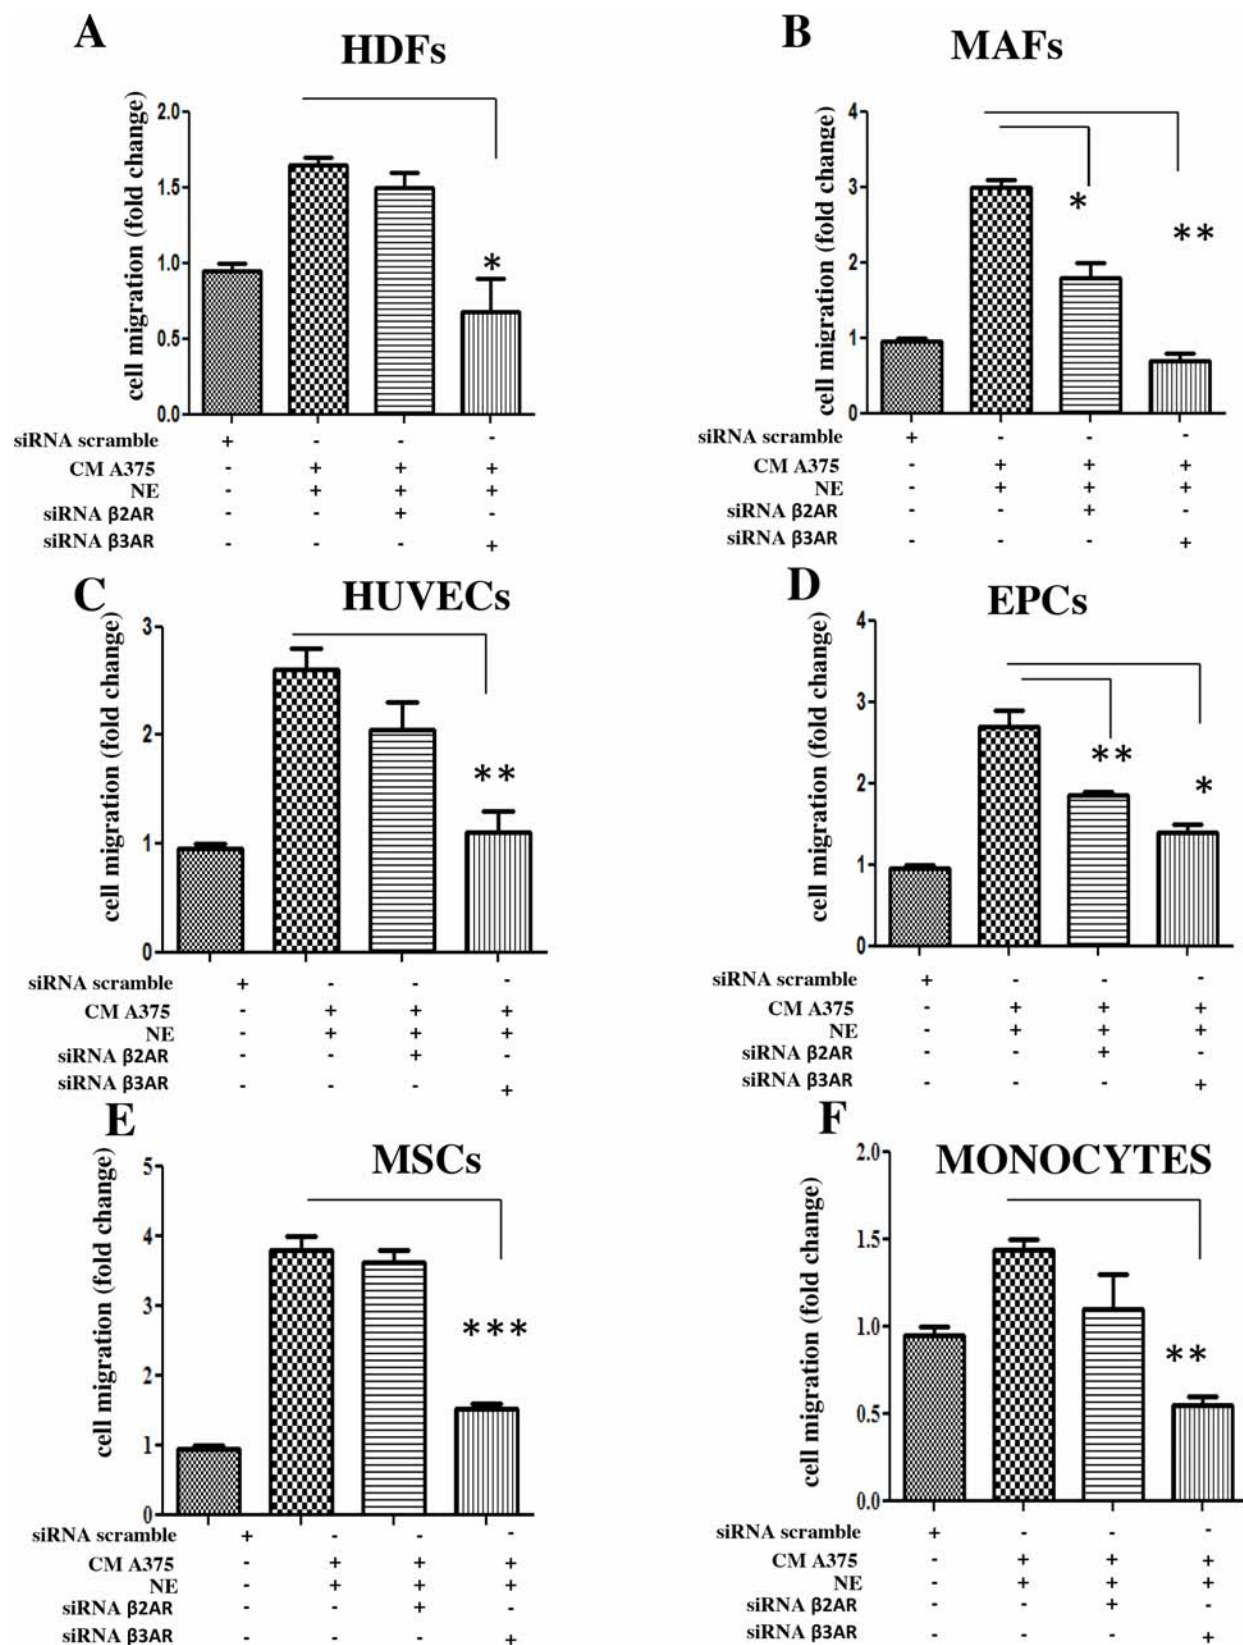

Supplementary Figure S2: Different stromal cells were allowed to migrate for 24 h toward CM derived from A375 melanoma cells subjected to siRNA silencing as indicated in the figure and described in Material and Methods. Figure shows recruitment of HDFs (A); MAFs (B); HUVECs (C); EPCs (D); MSCs (E) and monocytes (F).

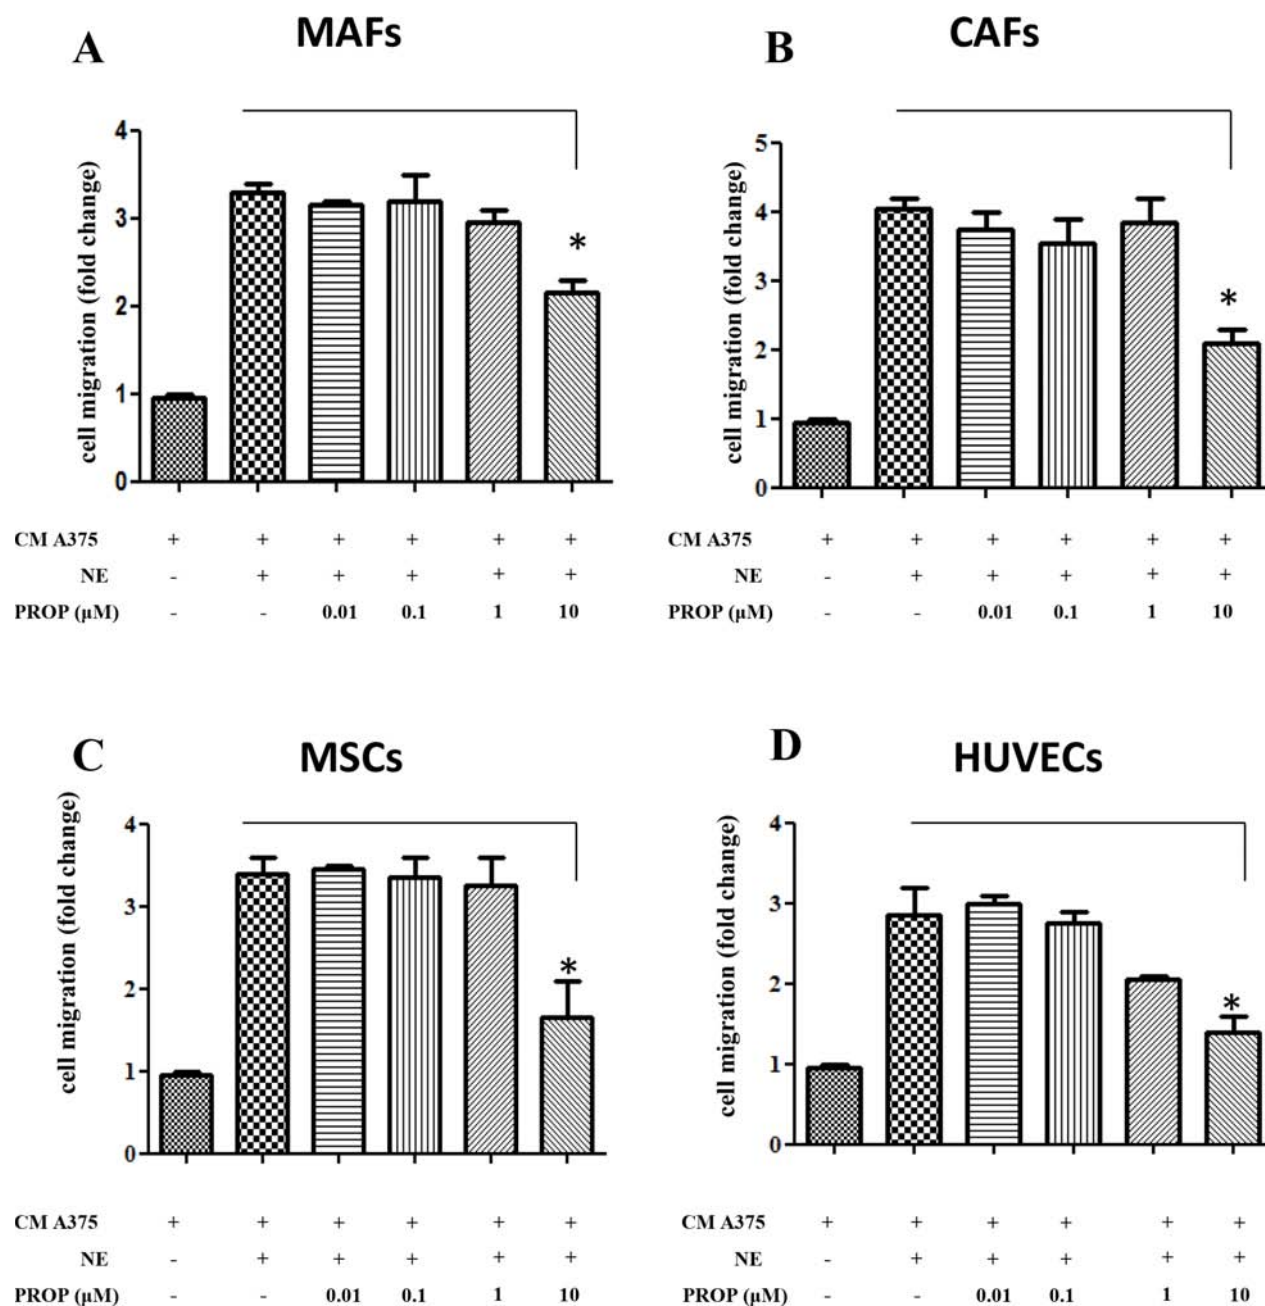

**Supplementary Figure S3: Different stromal cells were allowed to migrate for 24 hrs toward CM derived from A375 melanoma.** A375 cells were then incubated in the presence or absence of NE (10  $\mu$ M) and/or  $\beta$ -ARs antagonist propranolol at different concentration ranged from 0.01  $\mu$ M to 10  $\mu$ M. Figure shows recruitment of MAFs (A); HDFs (B); MSCs (C); HUVECs (D).

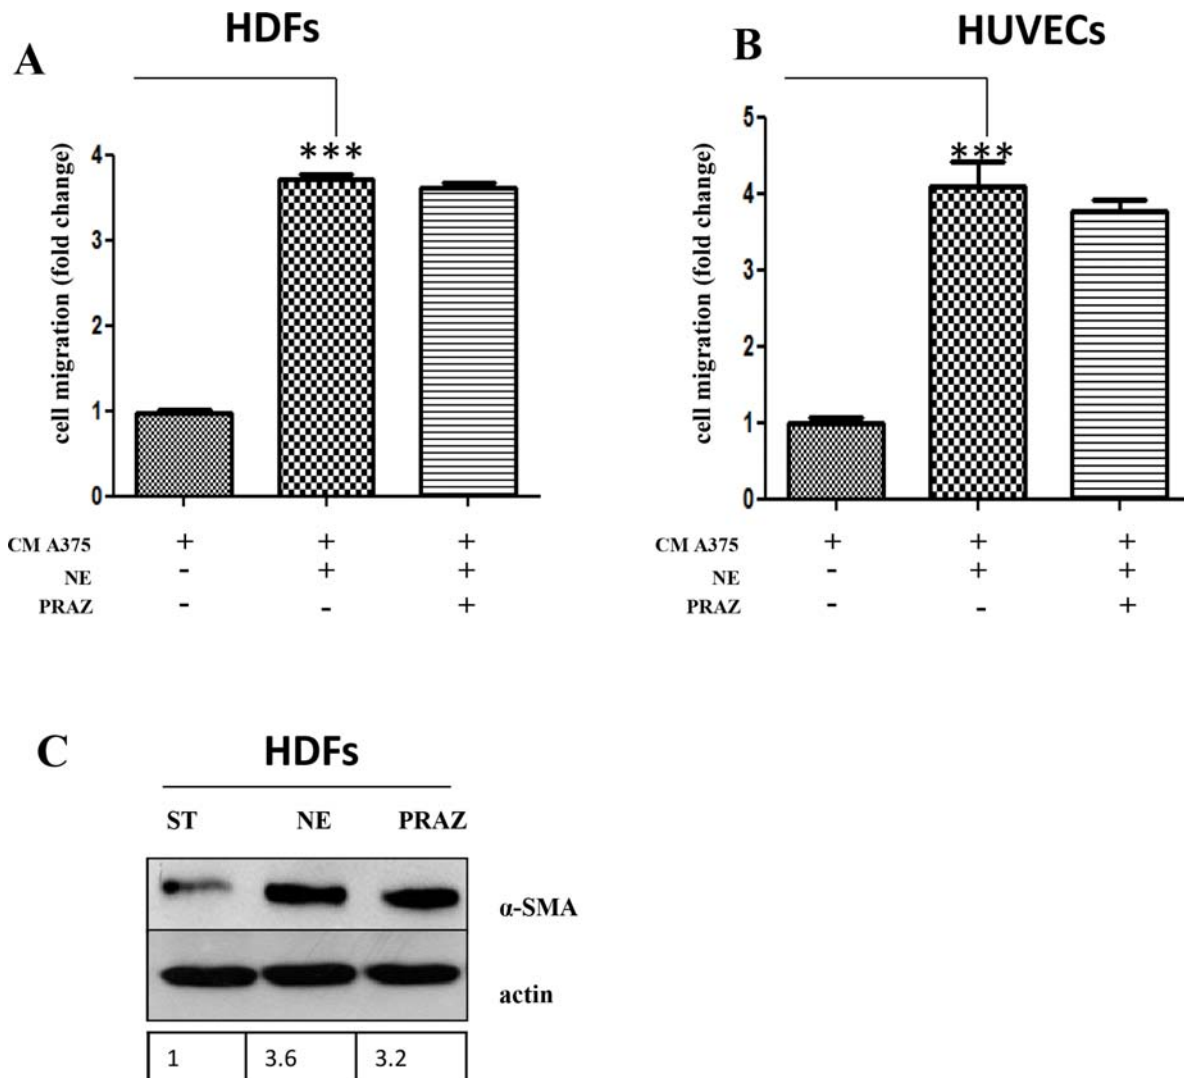

**Supplementary Figure S4:** HDFs and HUVECs were allowed to migrate for 24 hrs toward CM derived from A375 melanoma incubated in the presence or absence of NE (10  $\mu$ M) with or without  $\alpha$ 1ARs antagonist prazosin (10  $\mu$ M). Figure shows recruitment of HDFs (A); HUVECs (B). HDFs (C) were serum starved for 24 hours and then incubated for additional 24 hours in the presence or absence of NE (10 $\mu$ M) with or without  $\alpha$ 1ARs antagonist prazosin (10  $\mu$ M). Expression of  $\alpha$ -SMA was performed by immunoblotting. Actin was shown to ensure equal loading of protein.
